# Supplementary material for: Laurequinone, a Lead Compound against Leishmania
Source: MDPI journal article supplement (doi:10.3390/md21060333), 2023-05-30
Supplement: s1 [file s1]

## Supporting Information

### Laurequinone, a lead compound against *Leishmania*

Sara García-Davis<sup>1,2,†</sup>, Atteneri López-Arencibia<sup>3,4,5,6,†,\*</sup>, Carlos J. Bethencourt-Estrella<sup>3,4,6</sup>, Desirée San Nicolás-Hernández<sup>3,4,6</sup>, Ezequiel Viveros-Valdez<sup>7</sup>, Ana R. Díaz-Marrero<sup>1,8</sup>, José J. Fernández<sup>1,2</sup>, Jacob Lorenzo-Morales<sup>3,4,5,6</sup>, José E. Piñero<sup>3,4,5,6</sup>

<sup>1</sup> Instituto Universitario de Bio-Organica Antonio González (IUBO AG), Universidad de La Laguna (ULL), Avenida Astrofísico Francisco Sánchez 2, 38206 La Laguna, Tenerife, Spain

<sup>2</sup> Departamento de Química Orgánica, Universidad de La Laguna, Avenida Astrofísico Francisco Sánchez 2, 38206 La Laguna, Tenerife, Spain

<sup>3</sup> Instituto Universitario de Enfermedades Tropicales y Salud Pública de Canarias, Universidad de La Laguna, Avenida Astrofísico Francisco Sánchez S/N, 38206 La Laguna, Tenerife, Islas Canarias, Spain

<sup>4</sup> Consorcio Centro de Investigación Biomédica en Red M.P. de Enfermedades Infecciosas (CIBERINFEC), Instituto de Salud Carlos III, 28006 Madrid, Spain

<sup>5</sup> Departamento de Obstetricia y Ginecología, Pediatría, Medicina Preventiva y Salud Pública, Toxicología, Medicina Legal y Forense y Parasitología, Universidad de La Laguna, Tenerife, Spain

<sup>6</sup> Red de Investigación Cooperativa en Enfermedades Tropicales (RICET), Spain

<sup>7</sup> Facultad de Ciencias Biológicas, Universidad Autónoma de Nuevo León, Avenida Pedro de Alba S/N, San Nicolás de los Garza 66450, Nuevo León, Mexico

<sup>8</sup> Instituto de Productos Naturales y Agrobiología (IPNA), Consejo Superior de Investigaciones Científicas (CSIC), Avenida Astrofísico Francisco Sánchez 3, 38206 La Laguna, Tenerife, Spain

Physical data of laurequinone (**1**)

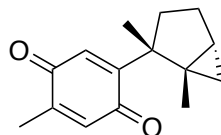

Laurequinone (**1**)

Yellow oil;  $[\alpha]^{25}_{\text{D}} -29$  (c 0.12,  $\text{CH}_2\text{Cl}_2$ )

HRESIMS  $m/z$  229.1231  $[\text{M}-\text{H}]^-$  (calc.  $\text{C}_{15}\text{H}_{17}\text{O}_2$ , 229.1229)

$^1\text{H}$  NMR (600 MHz,  $\text{CDCl}_3$ )  $\delta$  0.45 (2H, m, H-12), 1.07 (2H, m, H-3), 1.18 (1H, m, H-5), 1.18 (3H, s, H-15), 1.32 (3H, s, H-14), 1.66 (1H, d,  $J = 12.4, 8.1$  Hz, H-4), 1.94 (1H, ddt,  $J = 15.7, 7.8, 4.1$  Hz, H-4), 2.02 (3H, d,  $J = 1.6$  Hz, H-13), 2.05 (1H, dd,  $J = 13.4, 8.2$  Hz, H-5), 6.51 (1H, t,  $J = 1.6$  Hz, H-11), 6.87 (1H, s, H-8)

$^{13}\text{C}$  NMR (150 MHz,  $\text{CDCl}_3$ )  $\delta$  15.0 (C-12), 15.6 (C-13), 17.8 (C-15), 22.9 (C-14), 23.5 (C-3), 25.2 (C-4), 28.7 (C-2), 35.3 (C-5), 48.2 (C-1), 131.7 (C-8), 135.0 (C-11), 144.2 (C-9), 154.2 (C-6), 188.6 (C-7), 189.2 (C-10).

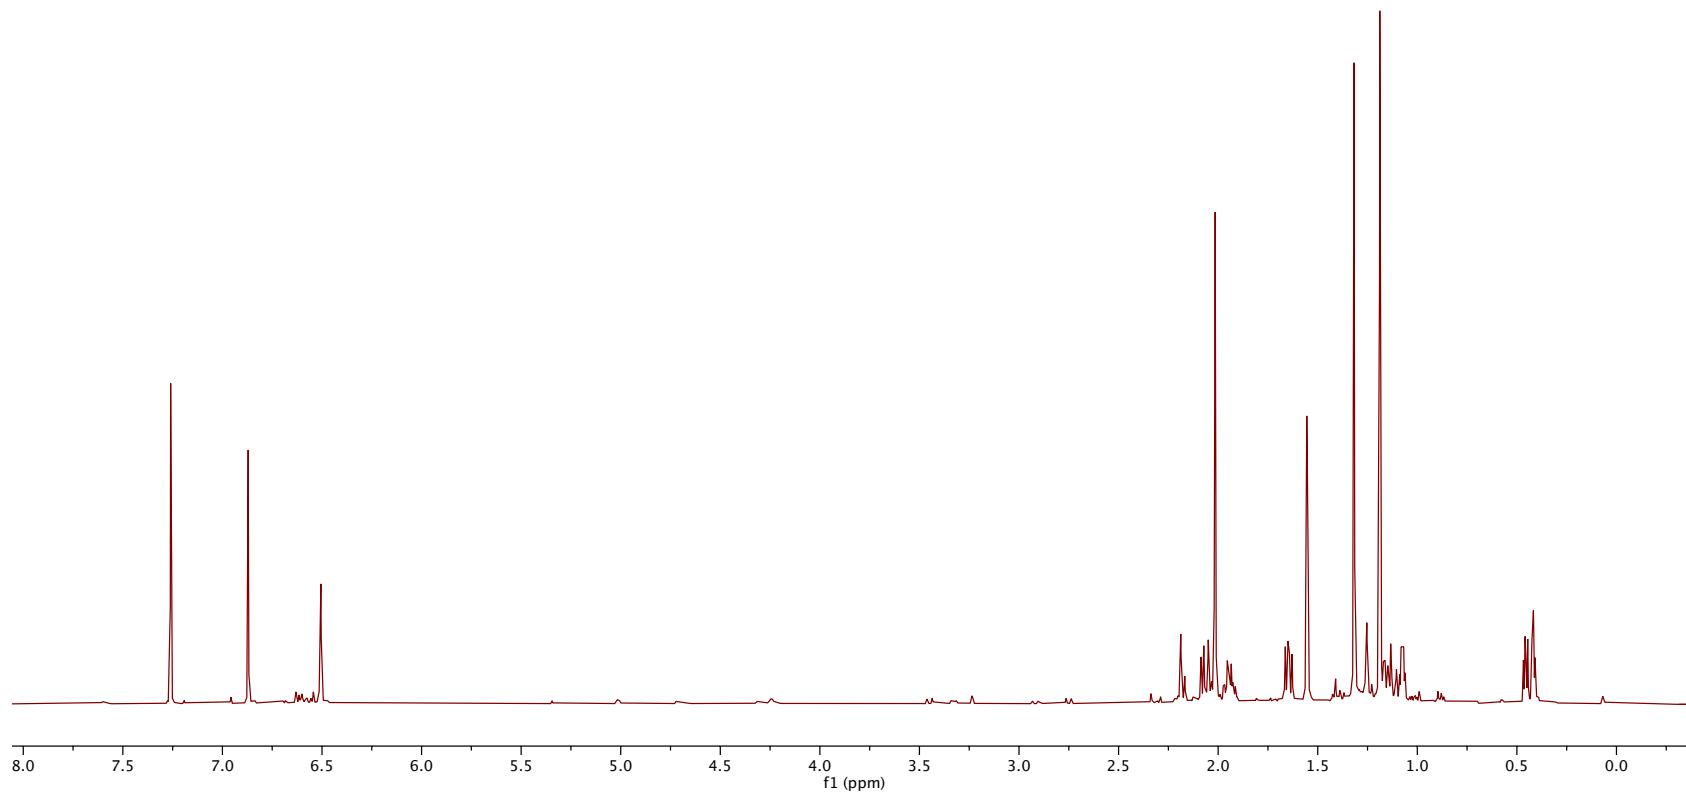

**Figure S1:**  $^1\text{H}$ -NMR spectrum of laurequinone (**1**) at 600 MHz in  $\text{CDCl}_3$

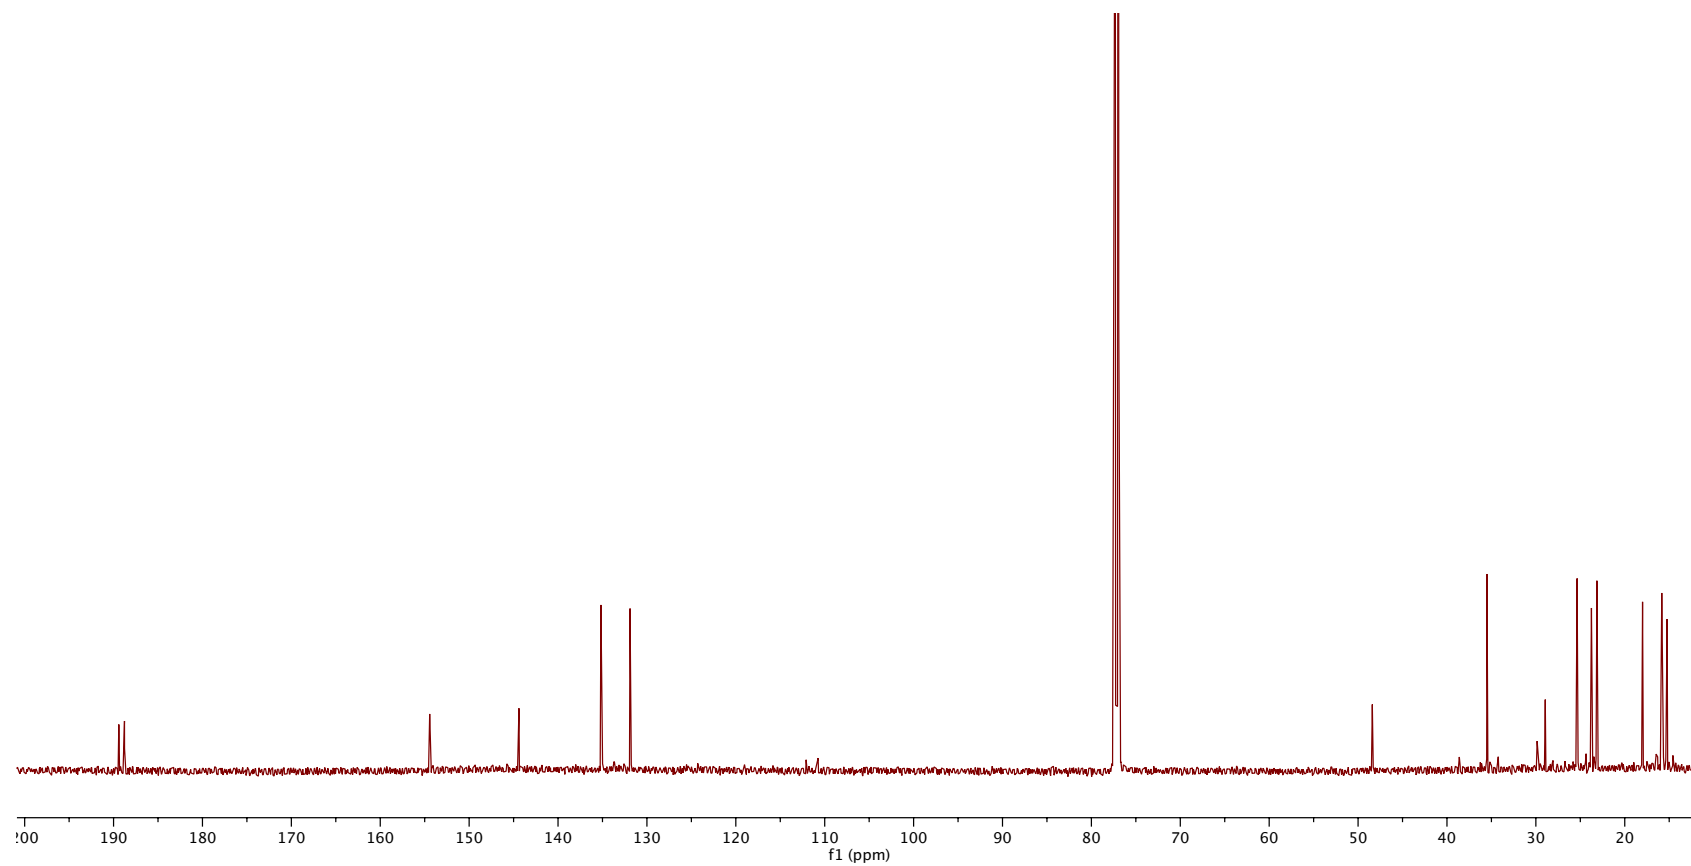

**Figure S2:**  $^{13}\text{C}$ -NMR spectrum of laurequinone (**1**) at 150 MHz in  $\text{CDCl}_3$

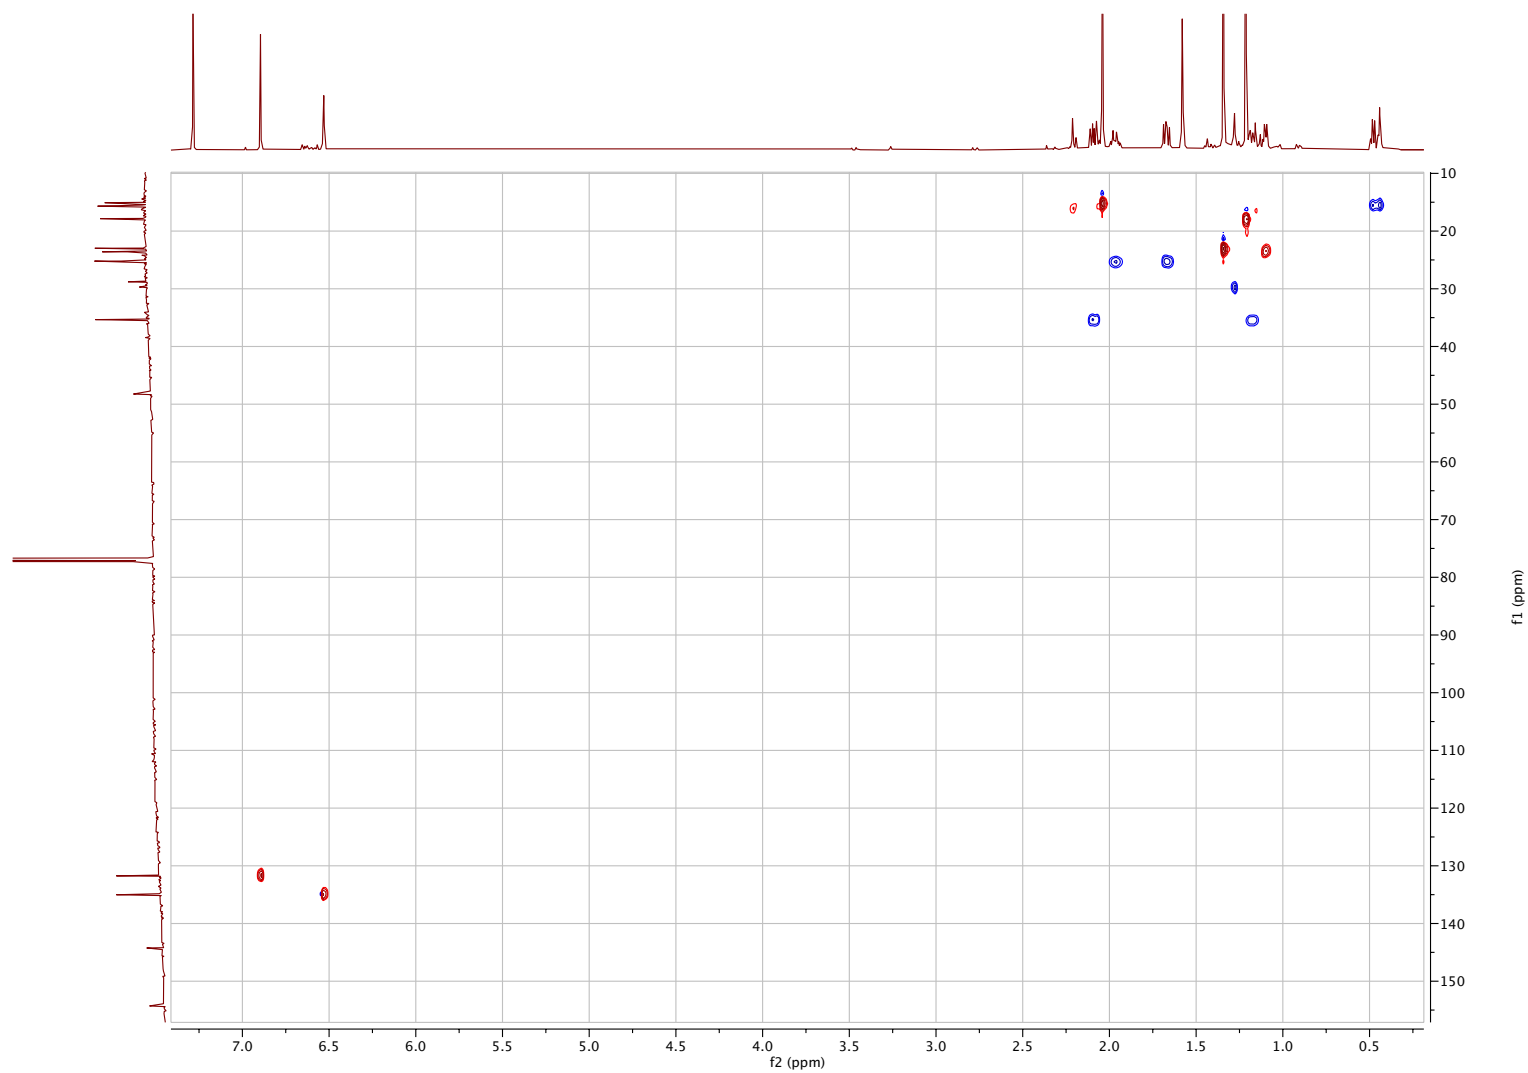

**Figure S3:** HSQC experiment of laurequinone (**1**) at 600 MHz in CDCl<sub>3</sub>

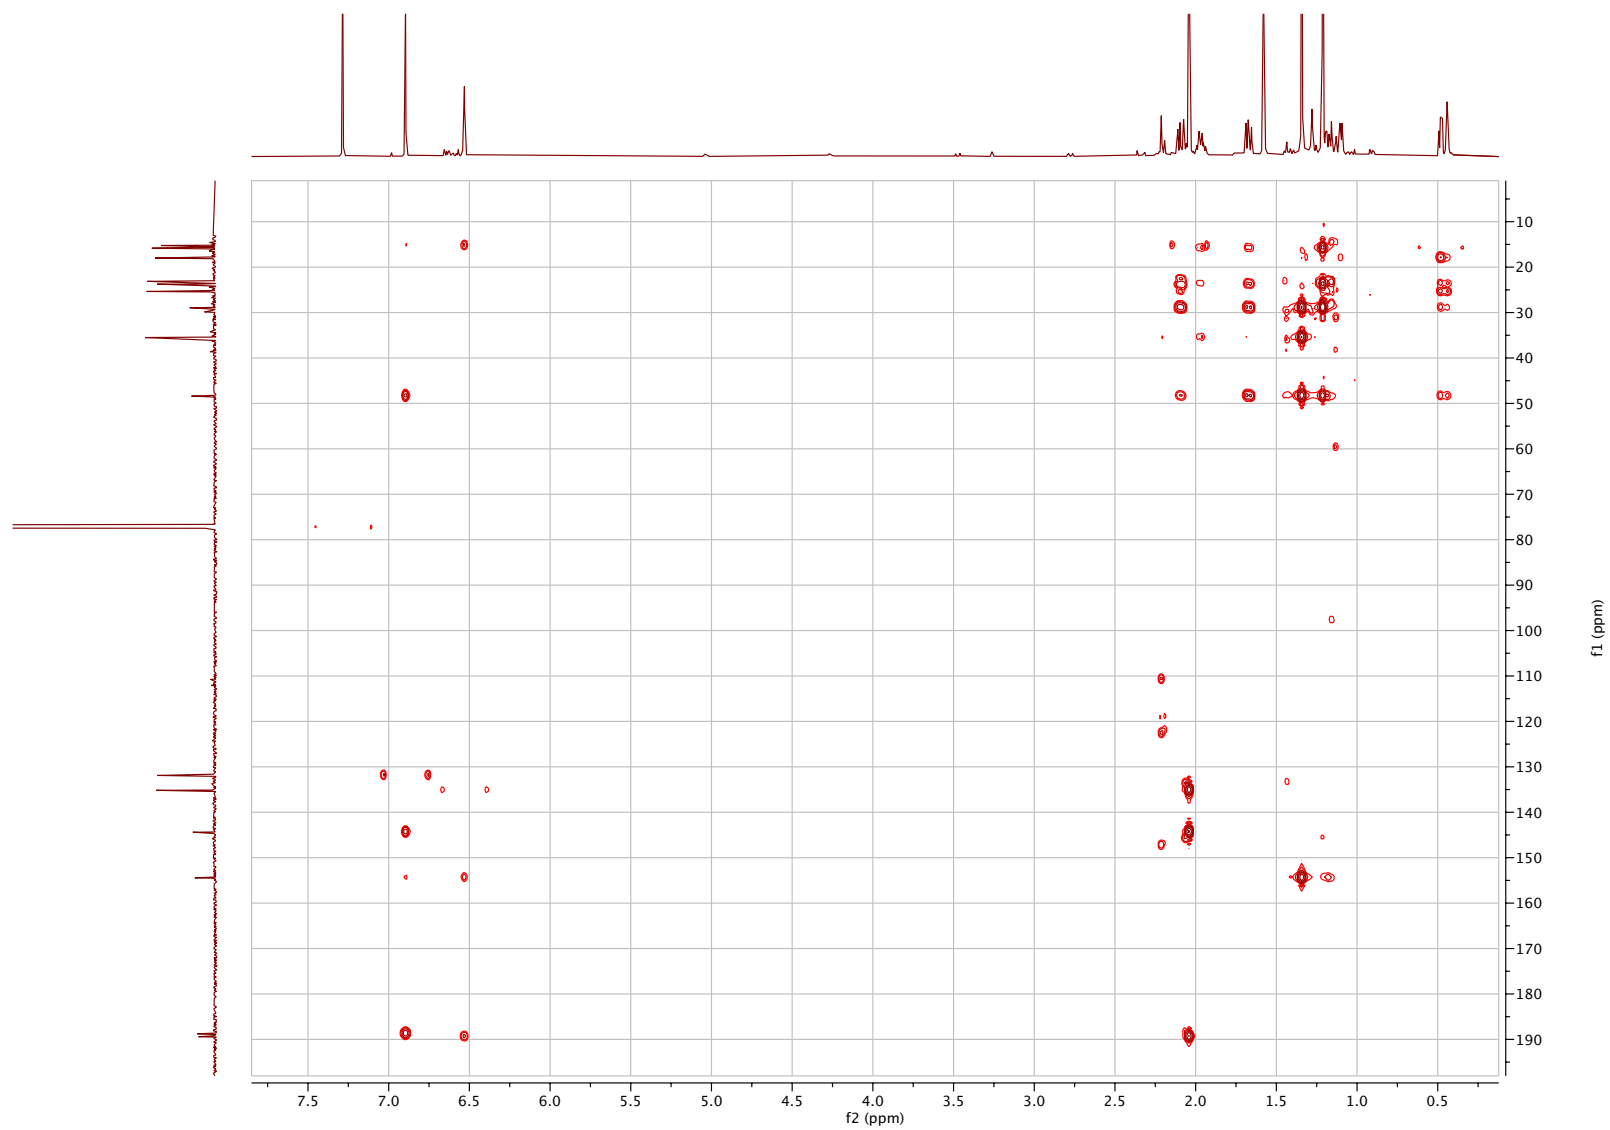

**Figure S4:** HMBC experiment of laurequinone (**1**) at 600 MHz in CDCl<sub>3</sub>
